# Supplementary material for: Use of a bis-1,2,3-triazole gelator for the preparation of supramolecular metallogels and stabilization of gold nanoparticles
Source: Royal Society of Chemistry journal article supplement (doi:10.1039/c9nj03427g), 2019-01-01
Supplement: c9nj03427g1.pdf [file c9nj03427g1.pdf]

## ***Supporting Information***

### **Use of a bis-1,2,3-triazole gelator for the preparation of supramolecular metallogels and stabilization of gold nanoparticles**

Markus Tautz,<sup>a</sup> César Saldías,<sup>b</sup> Antonio Diego Lozano-Gorrín<sup>c,d</sup> and David Díaz Díaz<sup>\*a,e</sup>

<sup>a</sup> *Institut für Organische Chemie, Universität Regensburg, Universitätsstr. 31, 93053 Regensburg, Germany.*

*E-mail: David.Diaz@chemie.uni-regensburg.de*

<sup>b</sup> *Departamento de Química Física, Facultad de Química, Pontificia Universidad Católica de Chile, Casilla 302, Correo 22, Santiago, Chile*

<sup>c</sup> *Departamento de Química, Universidad de La Laguna, 38206 La Laguna, Tenerife, Spain.*

<sup>d</sup> *Instituto Universitario de Materiales y Nanotecnología (IMN), Universidad de La Laguna, 38200 La Laguna, Tenerife, Spain*

<sup>e</sup> *Instituto de Productos Naturales y Agrobiología del CSIC, Avda. Astrofísico Francisco Sánchez 3, 38206 La Laguna, Tenerife, Spain*

*E-mail: d.diaz.diaz@ipna.csic.es*

## Contents List

| Fig. | Caption                                                                                                                                                                                                                                                                                                                                                                                                                                                                                                                                                                                                                                                                                                                                                                                                                                                                                             | page |
|------|-----------------------------------------------------------------------------------------------------------------------------------------------------------------------------------------------------------------------------------------------------------------------------------------------------------------------------------------------------------------------------------------------------------------------------------------------------------------------------------------------------------------------------------------------------------------------------------------------------------------------------------------------------------------------------------------------------------------------------------------------------------------------------------------------------------------------------------------------------------------------------------------------------|------|
| S1.  | Custom made set-up for $T_{\text{gel}}$ determination. A) Front view showing the composition between electric heating plate, alumina block and digital thermo-couple. B) Top view of the set-up during experimentation containing vials (4 cm length $\times$ 1 cm diameter) with gel materials. It is important to mention that the alumina block was constructed especially for one type of vials, which fit smoothly inside the molds to ensure a good transmission of the heat-flow. Verification of the independence of the position inside the custom made apparatus was also performed.                                                                                                                                                                                                                                                                                                      | S4   |
| S2.  | <i>Top</i> : Plots of $T_{\text{gel}}$ (A) and gelation time (B) vs concentrations of gelator <b>C<sub>12</sub>-Cyc</b> and gold in DMF. <i>Bottom</i> : Plots of $T_{\text{gel}}$ (C) and gelation time (D) vs concentrations of gelator <b>click-C<sub>12</sub>-Cyc</b> and gold in DMF. Note: H <sub>2</sub> AuCl <sub>4</sub> ·3H <sub>2</sub> O was found to be hardly soluble in nonpolar solvents and reasonably soluble in NMP, nitromethane, diethyl ether, acetone, DMF, DMSO, ethanol, propan-2-ol, THF and methanol.                                                                                                                                                                                                                                                                                                                                                                    | S5   |
| S3.  | FT-IR spectra of the metallo-xerogels obtained from <b>C<sub>12</sub>-Cyc</b> ( <i>top</i> ) and <b>click-C<sub>12</sub>-Cyc</b> ( <i>bottom</i> ) incorporating H <sub>2</sub> AuCl <sub>4</sub> ·3H <sub>2</sub> O (molar ratio gelator:metal = 1:1; $c = 40 \text{ mmol L}^{-1}$ ) in DMF.                                                                                                                                                                                                                                                                                                                                                                                                                                                                                                                                                                                                       | S6   |
| S4.  | PXRD spectrum of <b>C<sub>12</sub>-Cyc</b> ( <i>top</i> ) and <b>click-C<sub>12</sub>-Cyc</b> ( <i>bottom</i> ) xerogel incorporating H <sub>2</sub> AuCl <sub>4</sub> ·3H <sub>2</sub> O in DMF.                                                                                                                                                                                                                                                                                                                                                                                                                                                                                                                                                                                                                                                                                                   | S7   |
| S5.  | Response of metallogels prepared from <b>C<sub>12</sub>-Cyc</b> ( <i>left</i> ) and <b>click-C<sub>12</sub>-Cyc</b> ( <i>right</i> ) in DMF to UV light irradiation at 254 nm for 6 h.                                                                                                                                                                                                                                                                                                                                                                                                                                                                                                                                                                                                                                                                                                              | S8   |
| S6.  | Oscillatory rheological experiments of gels prepared from <b>C<sub>12</sub>-Cyc</b> and <b>click-C<sub>12</sub>-Cyc</b> in DMF ( $c = 40 \text{ g L}^{-1}$ ) incorporating H <sub>2</sub> AuCl <sub>4</sub> ·3H <sub>2</sub> O. <i>Top</i> : DFS-plots. <i>Middle</i> : DSS-plots. <i>Bottom</i> : DTS-Plots.                                                                                                                                                                                                                                                                                                                                                                                                                                                                                                                                                                                       | S9   |
| S7.  | UV-Vis spectra of gold nanoparticles dispersed in gels prepared from <b>C<sub>12</sub>-Cyc</b> ( $c = 20 \text{ mmol L}^{-1}$ ) ( <i>left</i> ) and <b>click-C<sub>12</sub>-Cyc</b> ( $c = 20 \text{ mmol L}^{-1}$ ) ( <i>right</i> ). Gels were suspended in DCM. Note 1: For $[\text{Au}] = 40 \text{ mmol L}^{-1}$ , the plasmon band was even more pronounced for the gel made of <b>click-C<sub>12</sub>-Cyc</b> . Note 2: Both gelators showed the same resonance bands as the corresponding raw gelator compounds. This suggested that the intermolecular interactions and the aggregation patterns remained similar when incorporating H <sub>2</sub> AuCl <sub>4</sub> ·3H <sub>2</sub> O into the network. In addition, xerogel formation from DMF was found to maintain a high degree of order inside the network as indicated by the crystalline behavior observed by XRD spectroscopy. | S10  |
| S8.  | Additional FESEM pictures of a xerogel prepared from <b>click-C<sub>12</sub>-Cyc</b> ( $c = 40 \text{ mmol L}^{-1}$ ) with H <sub>2</sub> AuCl <sub>4</sub> ·3H <sub>2</sub> O ( $c = 40 \text{ mmol L}^{-1}$ ) and Et <sub>3</sub> N ( $c = 400 \text{ mmol L}^{-1}$ ) in DMF.                                                                                                                                                                                                                                                                                                                                                                                                                                                                                                                                                                                                                     | S11  |
| S9.  | Additional TEM pictures of a gel prepared from <b>C<sub>12</sub>-Cyc</b> ( $c = 40 \text{ mmol L}^{-1}$ ) with H <sub>2</sub> AuCl <sub>4</sub> ·3H <sub>2</sub> O ( $c = 40 \text{ mmol L}^{-1}$ ) and Et <sub>3</sub> N ( $c = 400 \text{ mmol L}^{-1}$ ) in DMF.                                                                                                                                                                                                                                                                                                                                                                                                                                                                                                                                                                                                                                 | S12  |
| S10. | Additional TEM pictures of a gel prepared from <b>C<sub>12</sub>-Cyc</b> ( $c = 20 \text{ mmol L}^{-1}$ ) and <b>click-C<sub>12</sub>-Cyc</b> ( $c = 20 \text{ mmol L}^{-1}$ ) with H <sub>2</sub> AuCl <sub>4</sub> ·3H <sub>2</sub> O ( $c = 40 \text{ mmol L}^{-1}$ ) and Et <sub>3</sub> N ( $c = 400 \text{ mmol L}^{-1}$ ) in DMF.                                                                                                                                                                                                                                                                                                                                                                                                                                                                                                                                                            | S12  |
| S11. | Additional TEM pictures of a gel prepared from <b>click-C<sub>12</sub>-Cyc</b> ( $c = 40 \text{ mmol L}^{-1}$ ) with H <sub>2</sub> AuCl <sub>4</sub> ·3H <sub>2</sub> O ( $c = 40 \text{ mmol L}^{-1}$ ) and Et <sub>3</sub> N ( $c = 400 \text{ mmol L}^{-1}$ ) in DMF.                                                                                                                                                                                                                                                                                                                                                                                                                                                                                                                                                                                                                           | S13  |
| S12. | Nanoparticle size distribution diagrams of gels prepared from <b>C<sub>12</sub>-Cyc</b> ( $c =$                                                                                                                                                                                                                                                                                                                                                                                                                                                                                                                                                                                                                                                                                                                                                                                                     | S14  |

40 mmol L<sup>-1</sup>) (*left*), **C<sub>12</sub>-Cyc** and **click-C<sub>12</sub>-Cyc** (*c* = 20 mmol L<sup>-1</sup> (each)) (*middle*) and **click-C<sub>12</sub>-Cyc** (*c* = 40 mmol L<sup>-1</sup>) (*right*) with HAuCl<sub>4</sub>·3H<sub>2</sub>O (*c* = 40 mmol L<sup>-1</sup>) and Et<sub>3</sub>N (*c* = 400 mmol L<sup>-1</sup>) in DMF. Note: The use of DMF as solvent and Et<sub>3</sub>N as reducing agent enabled the easy preparation of the xerogels by freeze-drying the corresponding wet gels for 5 h under reduced pressure.

- S13.** Appearance of gold NPs-containing xerogel of **click-C<sub>12</sub>-Cyc**. S14

### Contents List

| Table | Caption                                                                                                                                                                                                                                                 | page |
|-------|---------------------------------------------------------------------------------------------------------------------------------------------------------------------------------------------------------------------------------------------------------|------|
| S1.   | Screening of gel formation with different mixtures containing <b>click-C<sub>12</sub>-Cyc</b> and 250 μL of solvent in the presence of metal ions.                                                                                                      | S15  |
| S2.   | Screening of gel formation with different mixtures containing <b>C<sub>12</sub>-Cyc</b> , <b>click-C<sub>12</sub>-Cyc</b> and 250 μL of solvent in the presence of gold and platinum salts.                                                             | S18  |
| S3.   | Screening of gel formation and reduction potential with different mixtures containing <b>C<sub>12</sub>-Cyc</b> , <b>click-C<sub>12</sub>-Cyc</b> and 250 μL of solvent in the presence of HAuCl <sub>4</sub> · 3 H <sub>2</sub> O and reducing agents. | S20  |

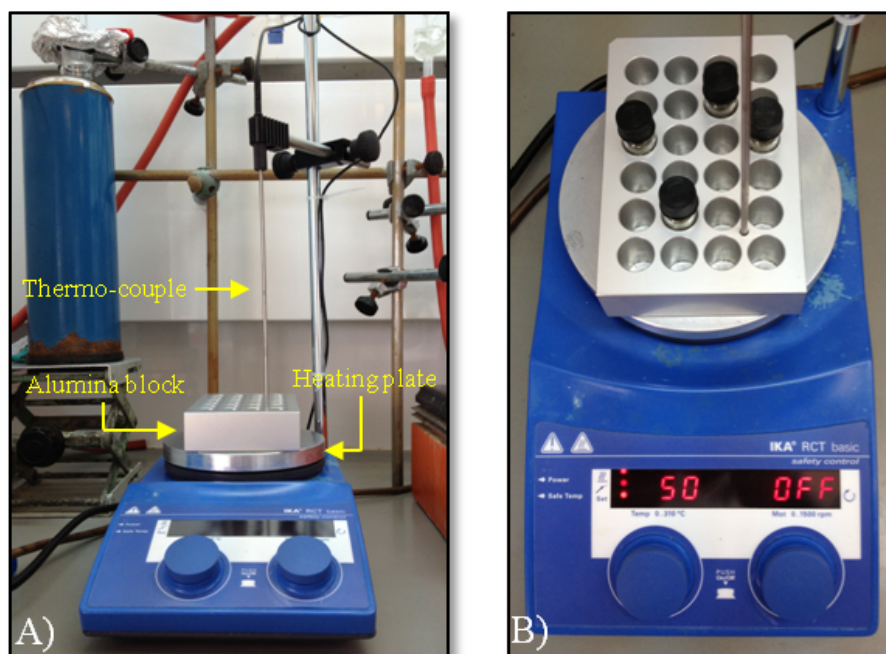

**Fig. S1** Custom made set-up for  $T_{gel}$  determination. A) Front view showing the composition between electric heating plate, alumina block and digital thermo-couple. B) Top view of the set-up during experimentation containing vials (4 cm length  $\times$  1 cm diameter) with gel materials. It is important to mention that the alumina block was constructed especially for one type of vials, which fit smoothly inside the molds to ensure a good transmission of the heat-flow. Verification of the independence of the position inside the custom made apparatus was also performed.

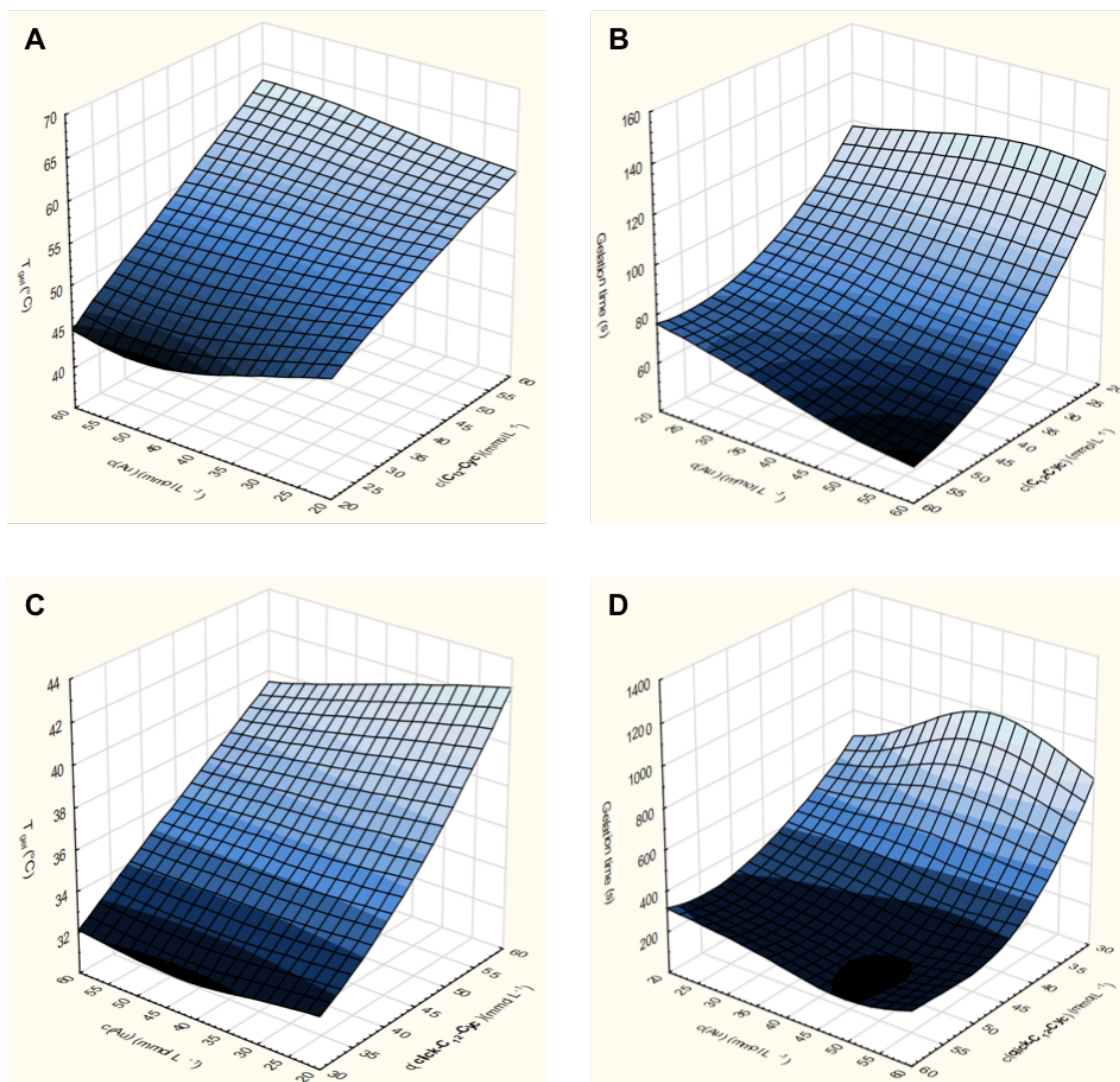

**Fig. S2** Top: Plots of  $T_{gel}$  (A) and gelation time (B) vs concentrations of gelator **C<sub>12</sub>-Cyc** and gold in DMF. Bottom: Plots of  $T_{gel}$  (C) and gelation time (D) vs concentrations of gelator **click-C<sub>12</sub>-Cyc** and gold in DMF. Note:  $\text{HAuCl}_4 \cdot 3\text{H}_2\text{O}$  was found to be hardly soluble in nonpolar solvents and reasonably soluble in NMP, nitromethane, diethyl ether, acetone, DMF, DMSO, ethanol, propan-2-ol, THF and methanol.

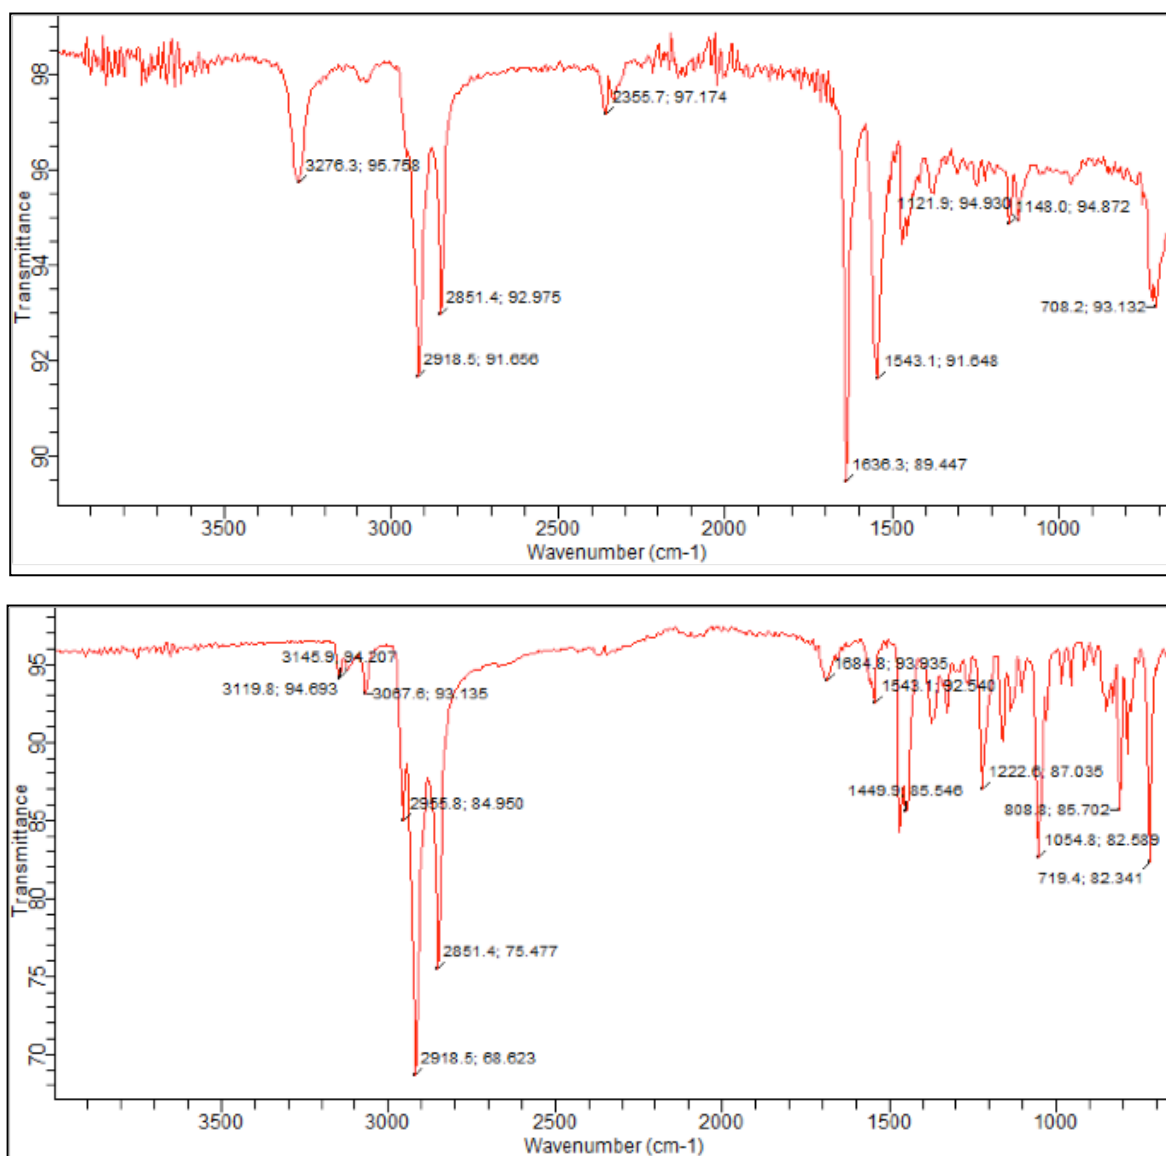

**Fig. S3** FT-IR spectra of the metallo-xerogels obtained from  $C_{12}$ -Cyc (*top*) and click- $C_{12}$ -Cyc (*bottom*) incorporating  $H AuCl_4 \cdot 3H_2O$  (molar ratio gelator:metal = 1:1;  $c = 40 \text{ mmol L}^{-1}$ ) in DMF.

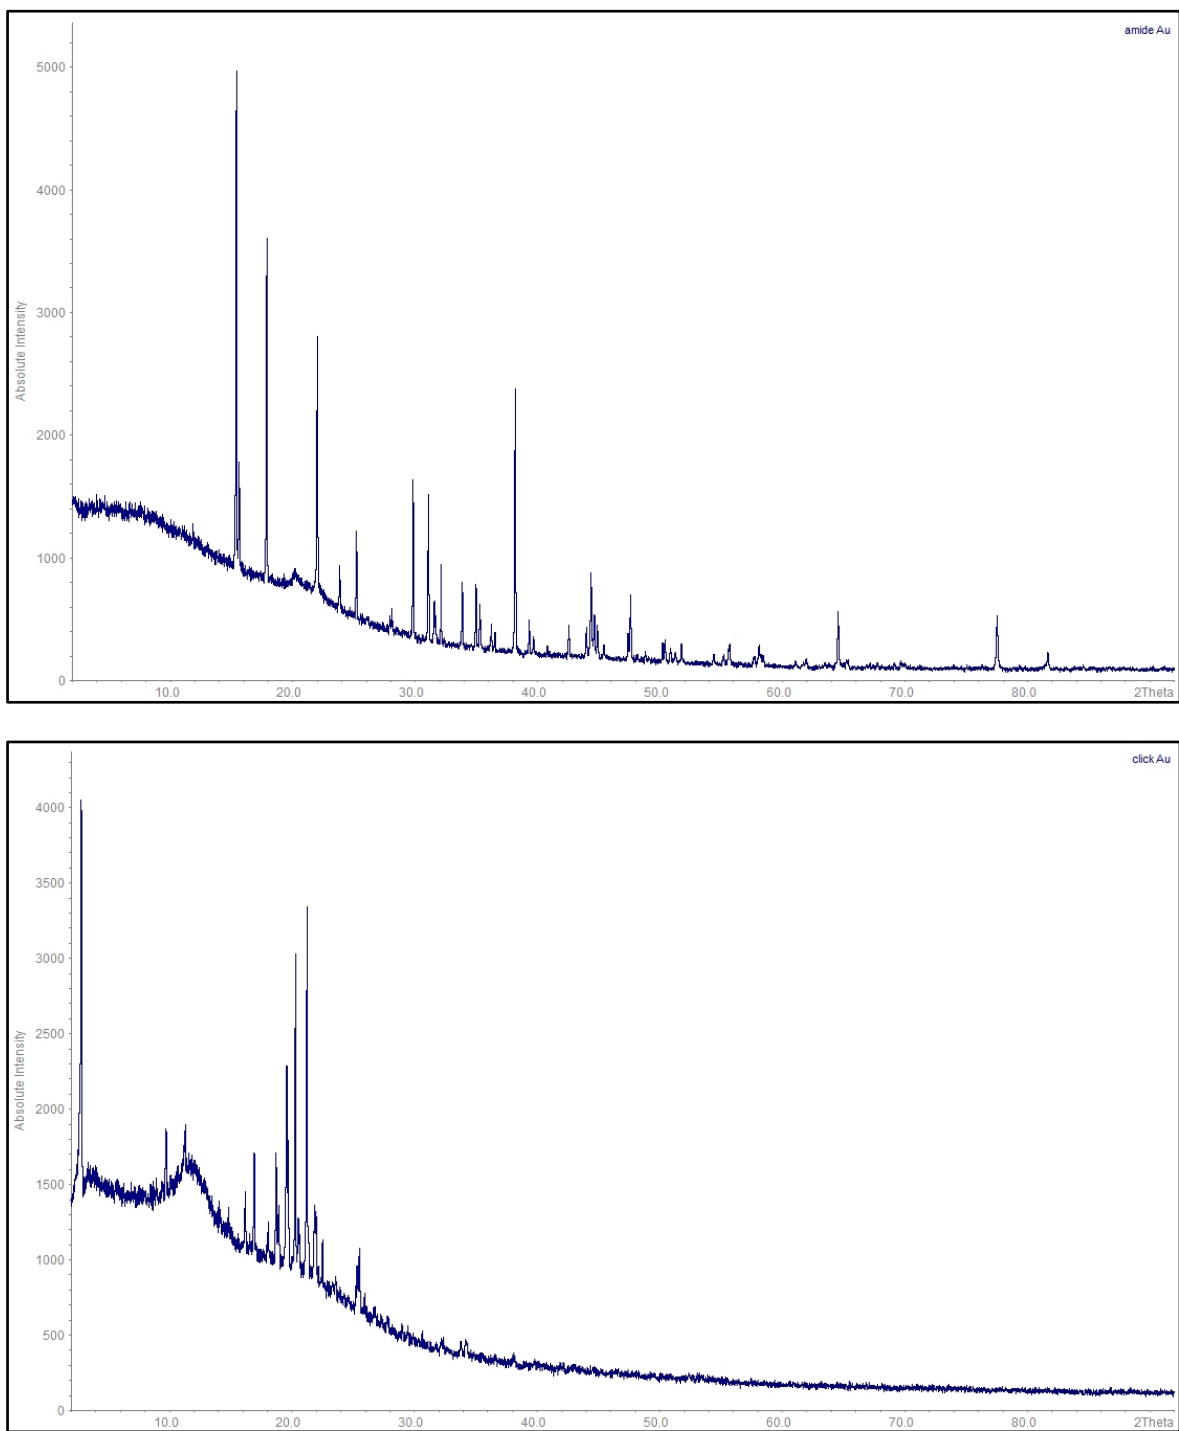

**Fig. S4** PXR D spectrum of  $C_{12}$ -Cyc (*top*) and click- $C_{12}$ -Cyc (*bottom*) xerogel incorporating  $H AuCl_4 \cdot 3H_2O$  in DMF.

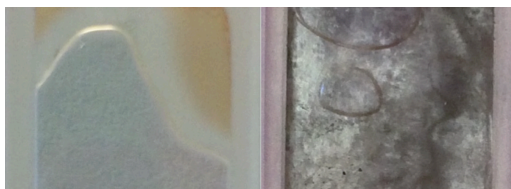

**Fig. S5** Response of metallogels prepared from **C<sub>12</sub>-Cyc** (*left*) and **click-C<sub>12</sub>-Cyc** (*right*) in DMF to UV light irradiation at 254 nm for 6 h.



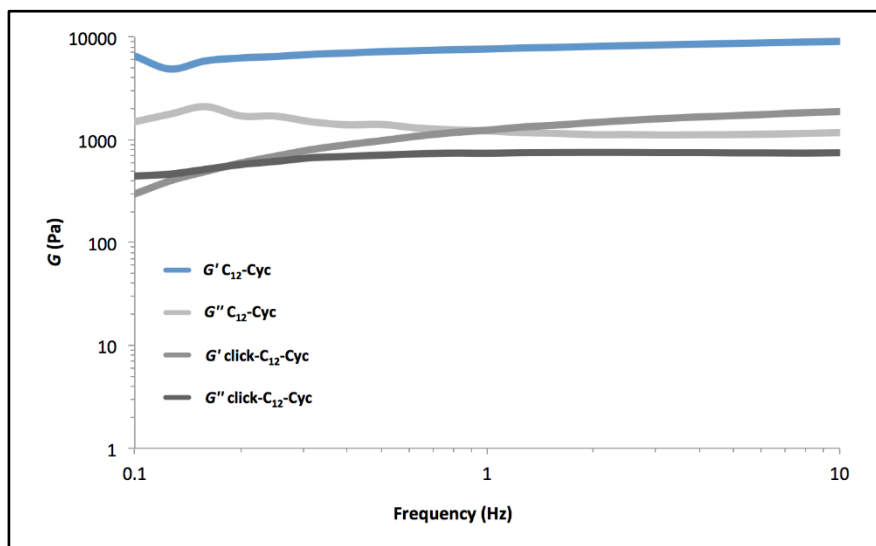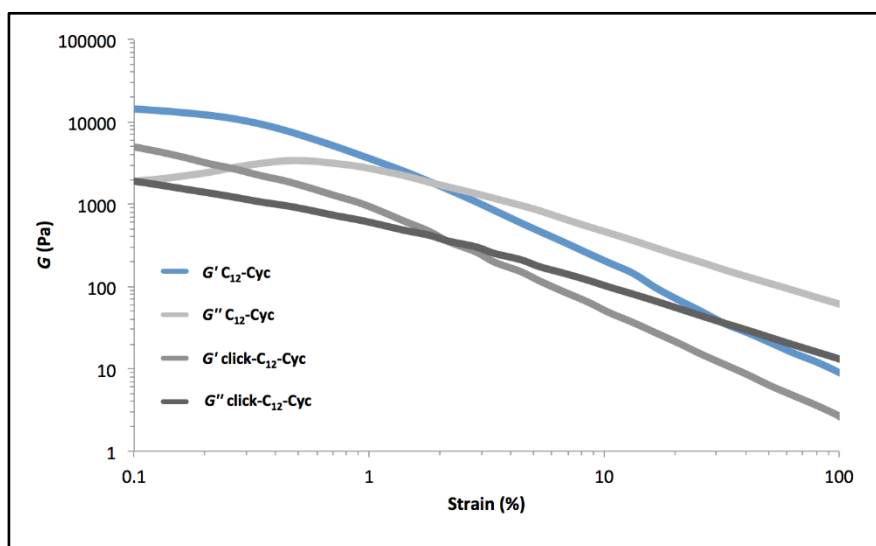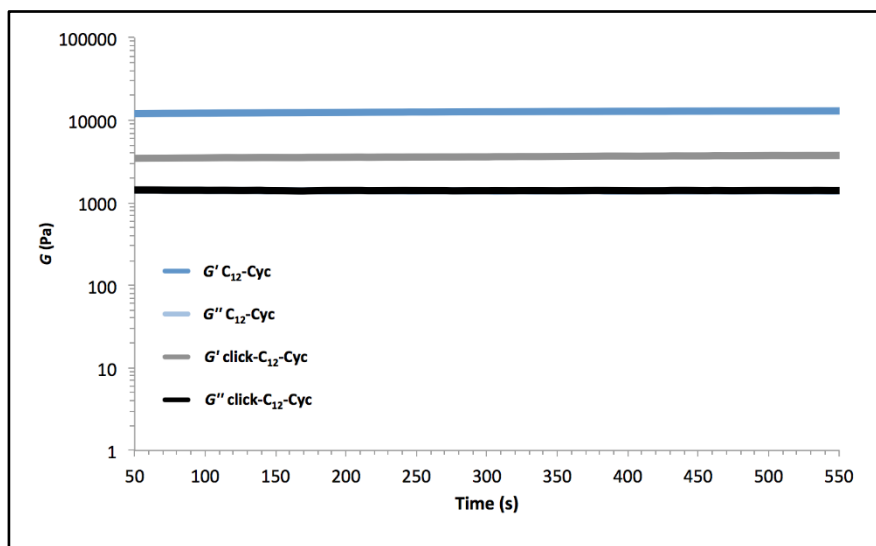

**Fig. S6** Oscillatory rheological experiments of gels prepared from C<sub>12</sub>-Cyc and click-C<sub>12</sub>-Cyc in DMF ( $c = 40 \text{ g L}^{-1}$ ) incorporating H<sub>2</sub>AuCl<sub>4</sub>·3H<sub>2</sub>O. *Top*: DFS-plots. *Middle*: DSS-plots. *Bottom*: DTS-Plots. Note: Although it is not visible in the plot,  $G''$  data are located under the  $G'$  data of click-C<sub>12</sub>-Cyc.

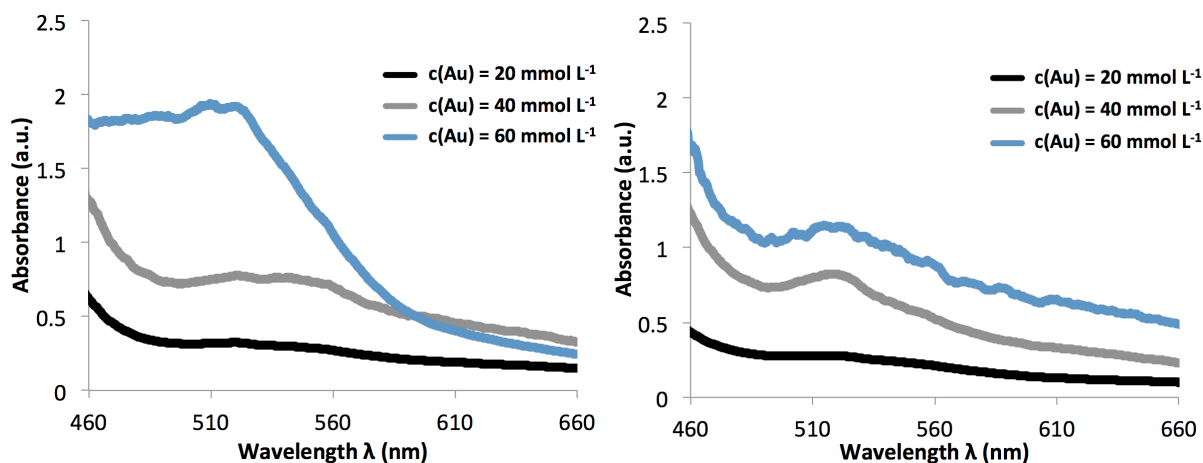

**Fig. S7** UV-Vis spectra of gold nanoparticles dispersed in gels prepared from  $\text{C}_{12}\text{-Cyc}$  ( $c = 20 \text{ mmol L}^{-1}$ ) (*left*) and  $\text{click-C}_{12}\text{-Cyc}$  ( $c = 20 \text{ mmol L}^{-1}$ ) (*right*). Gels were suspended in DCM. Note 1: For  $[\text{Au}] = 40 \text{ mmol L}^{-1}$ , the plasmon band was even more pronounced for the gel made of  $\text{click-C}_{12}\text{-Cyc}$ . Note 2: Both gelators showed the same resonance bands as the corresponding raw gelator compounds. This suggested that the intermolecular interactions and the aggregation patterns remained similar when incorporating  $\text{HAuCl}_4 \cdot 3\text{H}_2\text{O}$  into the network. In addition, xerogel formation from DMF was found to maintain a high degree of order inside the network as indicated by the crystalline behavior observed by XRD spectroscopy.

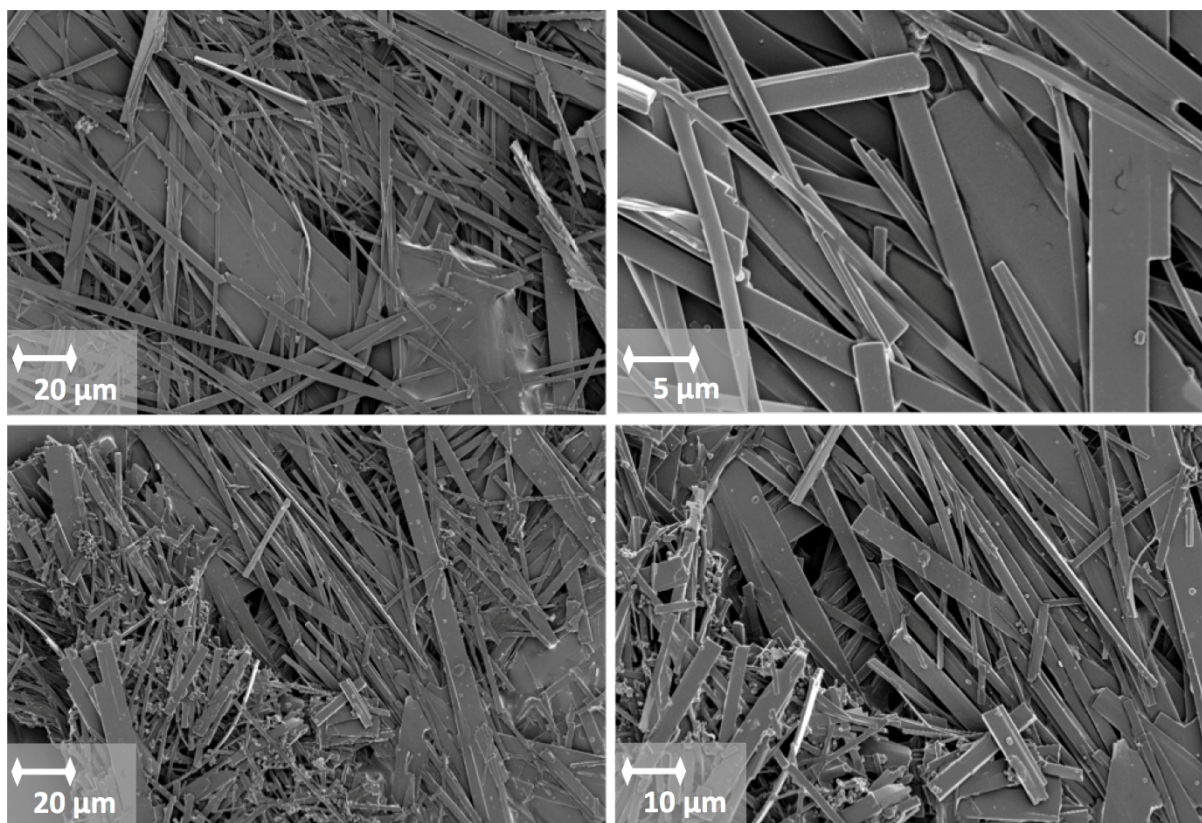

**Fig. S8** Additional FESEM pictures of a xerogel prepared from **click-C<sub>12</sub>-Cyc** ( $c = 40 \text{ mmol L}^{-1}$ ) with  $\text{HAuCl}_4 \cdot 3\text{H}_2\text{O}$  ( $c = 40 \text{ mmol L}^{-1}$ ) and  $\text{Et}_3\text{N}$  ( $c = 400 \text{ mmol L}^{-1}$ ) in DMF.

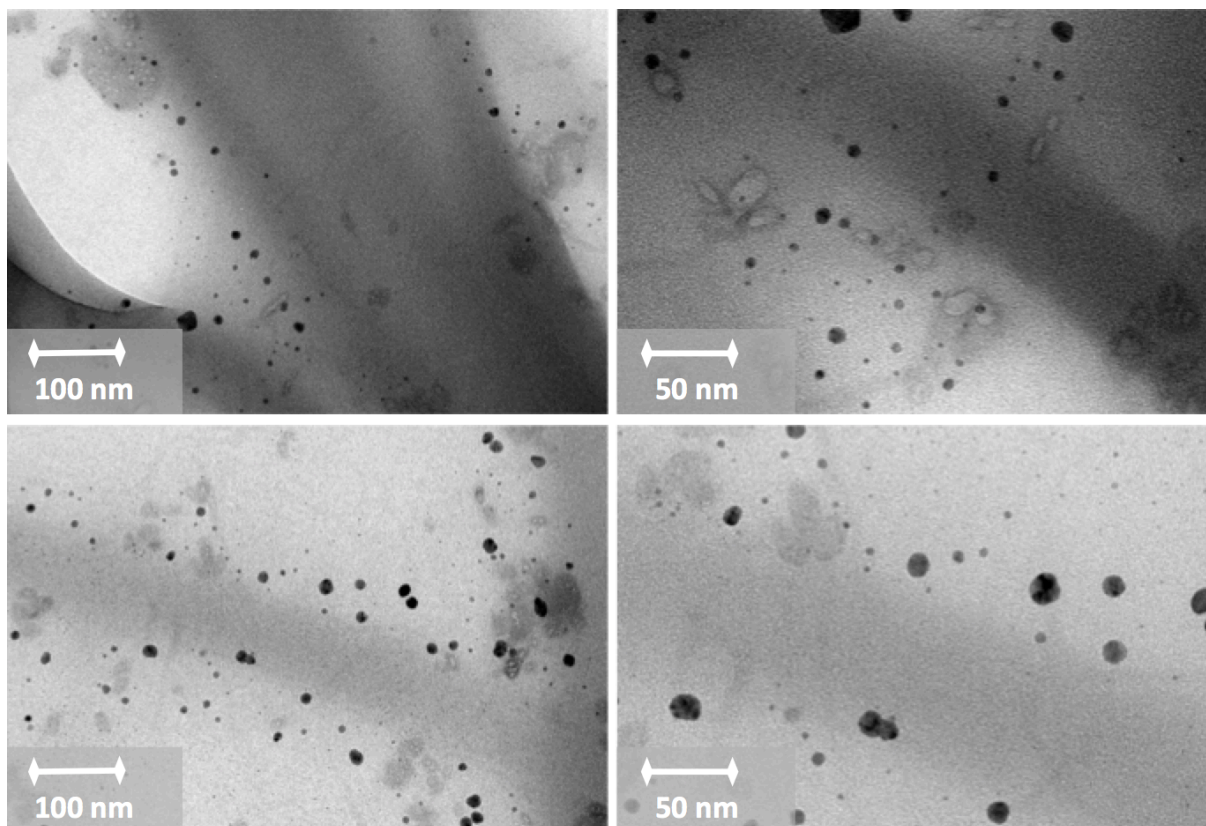

**Fig. S9** Additional TEM pictures of a gel prepared from  $C_{12}$ -Cyc ( $c = 40 \text{ mmol L}^{-1}$ ) with  $\text{HAuCl}_4 \cdot 3\text{H}_2\text{O}$  ( $c = 40 \text{ mmol L}^{-1}$ ) and  $\text{Et}_3\text{N}$  ( $c = 400 \text{ mmol L}^{-1}$ ) in DMF.

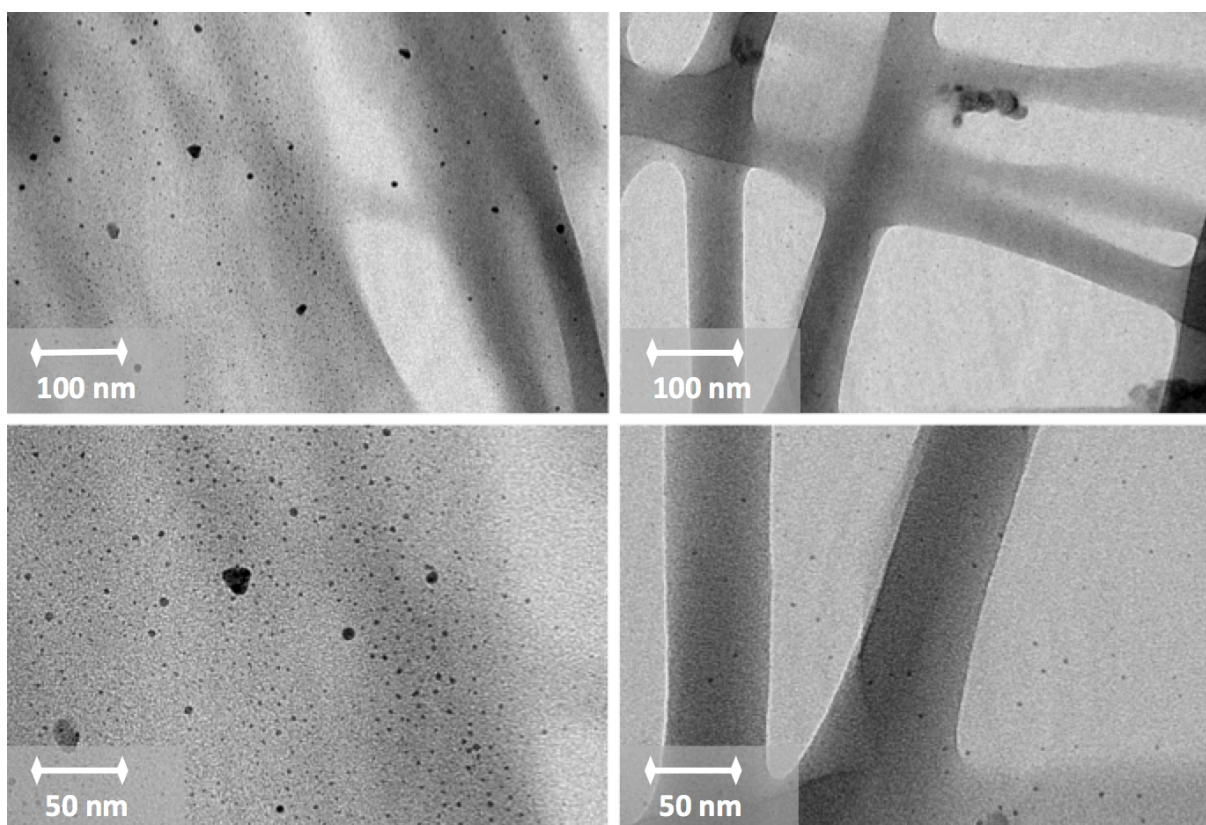

**Fig. S10** Additional TEM pictures of a gel prepared from  $C_{12}$ -Cyc ( $c = 20 \text{ mmol L}^{-1}$ ) and **click- $C_{12}$ -Cyc** ( $c = 20 \text{ mmol L}^{-1}$ ) with  $\text{HAuCl}_4 \cdot 3\text{H}_2\text{O}$  ( $c = 40 \text{ mmol L}^{-1}$ ) and  $\text{Et}_3\text{N}$  ( $c = 400 \text{ mmol L}^{-1}$ ) in DMF.

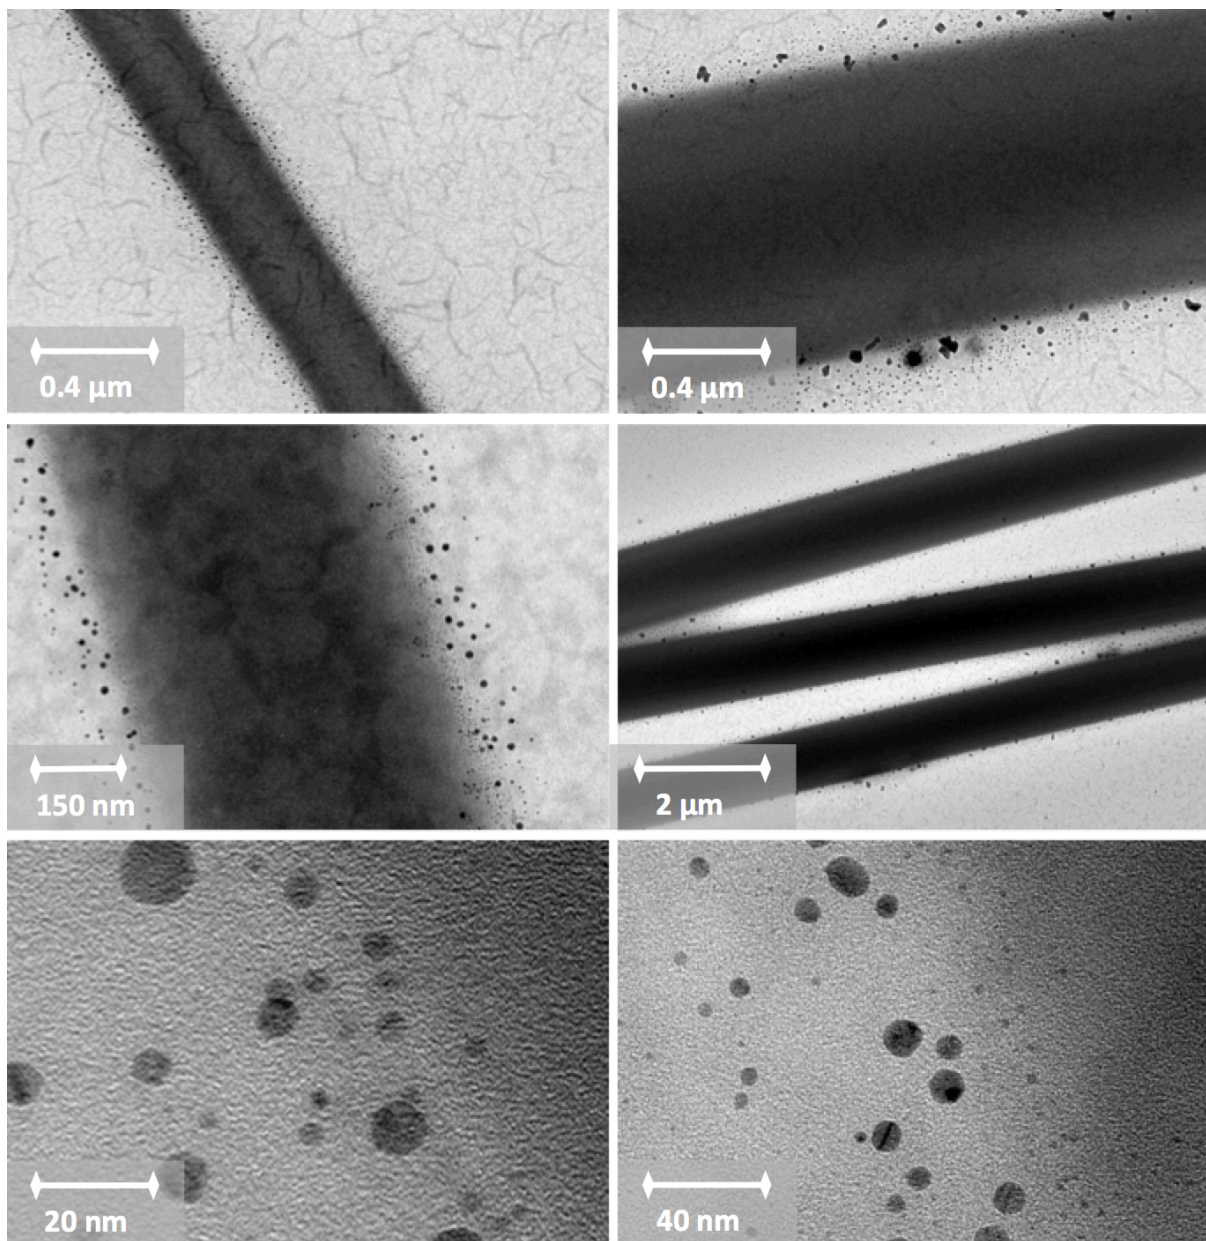

**Fig. S11** Additional TEM pictures of a gel prepared from **click-C<sub>12</sub>-Cyc** ( $c = 40 \text{ mmol L}^{-1}$ ) with  $\text{HAuCl}_4 \cdot 3\text{H}_2\text{O}$  ( $c = 40 \text{ mmol L}^{-1}$ ) and  $\text{Et}_3\text{N}$  ( $c = 400 \text{ mmol L}^{-1}$ ) in DMF.

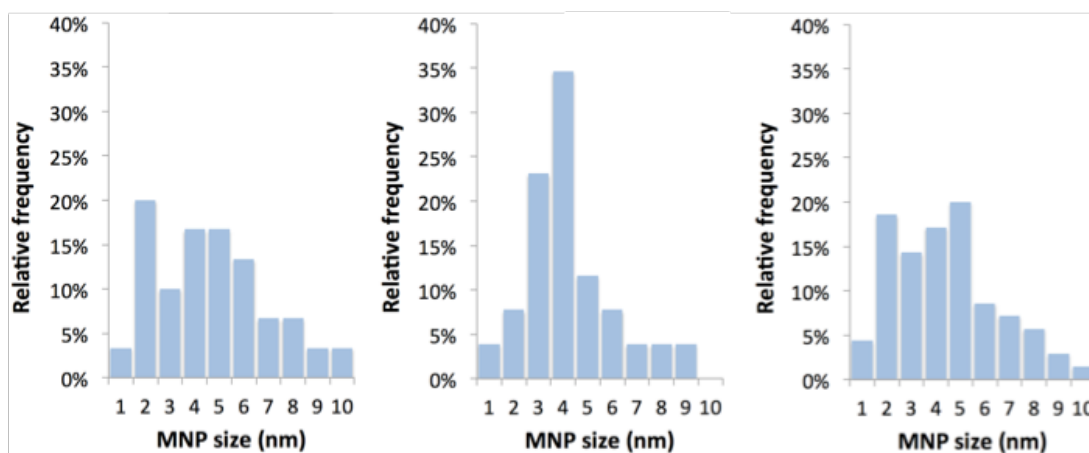

**Fig. S12** Nanoparticle size distribution diagrams of gels prepared from  $C_{12}$ -Cyc ( $c = 40 \text{ mmol L}^{-1}$ ) (*left*),  $C_{12}$ -Cyc and **click- $C_{12}$ -Cyc** ( $c = 20 \text{ mmol L}^{-1}$  (each)) (*middle*) and **click- $C_{12}$ -Cyc** ( $c = 40 \text{ mmol L}^{-1}$ ) (*right*) with  $\text{HAuCl}_4 \cdot 3\text{H}_2\text{O}$  ( $c = 40 \text{ mmol L}^{-1}$ ) and  $\text{Et}_3\text{N}$  ( $c = 400 \text{ mmol L}^{-1}$ ) in DMF. Note: The use of DMF as solvent and  $\text{Et}_3\text{N}$  as reducing agent enabled the easy preparation of the xerogels by freeze-drying the corresponding wet gels for 5 h under reduced pressure.

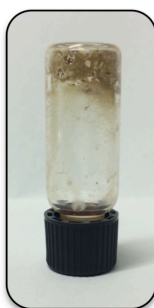

**Fig. S13** Appearance of gold NPs-containing xerogel of **click- $C_{12}$ -Cyc**.

**Table S1** Screening of gel formation with different mixtures containing **click-C<sub>12</sub>-Cyc** and 250  $\mu\text{L}$  of solvent in the presence of metal ions.

| Entry | Metal salt                                   | Solvent | Preparation     | $\beta$ ( <b>click-C<sub>12</sub>-Cyc</b> ) / $\text{mg mL}^{-1}$ | $\beta$ (metal) / $\text{mg mL}^{-1}$ | c (metal) / mol% | Appearance |
|-------|----------------------------------------------|---------|-----------------|-------------------------------------------------------------------|---------------------------------------|------------------|------------|
| 1     | $\text{PdCl}_2$                              | DMSO    | heat., sonic.   | 4,8                                                               | 2,0                                   | 124%             | op. sol.   |
| 2     | $\text{PdCl}_2$                              | DMF     | heat., sonic.   | 5,6                                                               | 1,6                                   | 85%              | cl. sol.   |
| 3     | $\text{Cu(OAc)}_2 \cdot \text{H}_2\text{O}$  | DMSO    | heat., sonic.   | 6,4                                                               | 2,8                                   | 115%             | op. sol.   |
| 4     | $\text{Cu(OAc)}_2 \cdot \text{H}_2\text{O}$  | DMF     | heat., sonic.   | 4,8                                                               | 1,6                                   | 88%              | cl. sol.   |
| 5     | $\text{Co(OAc)}_2 \cdot 4\text{H}_2\text{O}$ | DMSO    | heat., sonic.   | 4,8                                                               | 2,0                                   | 88%              | op. sol.   |
| 6     | $\text{Co(OAc)}_2 \cdot 4\text{H}_2\text{O}$ | DMF     | heat., sonic.   | 5,6                                                               | 2,0                                   | 76%              | cl. sol.   |
| 7     | $\text{CoCl}_2 \cdot 6\text{H}_2\text{O}$    | DMSO    | heat, son.      | 4,4                                                               | 2,4                                   | 121%             | op. sol.   |
| 8     | $\text{CoCl}_2 \cdot 6\text{H}_2\text{O}$    | DMF     | heat., sonic.   | 4,4                                                               | 2,0                                   | 101%             | cl. sol.   |
| 9     | $\text{NiCl}_2 \cdot 6\text{H}_2\text{O}$    | DMSO    | heat., sonic.   | 5,2                                                               | 2,0                                   | 85%              | op. sol.   |
| 10    | $\text{NiCl}_2 \cdot 6\text{H}_2\text{O}$    | DMF     | heat., sonic.   | 5,6                                                               | 2,4                                   | 95%              | cl. sol.   |
| 11    | -                                            | DMSO    | heat., sonic.   | 5,2                                                               | -                                     | -                | op. sol.   |
| 12    | -                                            | DMF     | heat., sonic.   | 5,2                                                               | -                                     | -                | cl. sol.   |
| 13    | $\text{PdCl}_2$                              | DMSO    | heat. and cool. | 4,8                                                               | 2,0                                   | 124%             | op. sol.   |
| 14    | $\text{PdCl}_2$                              | DMF     | heat. and cool. | 5,6                                                               | 1,6                                   | 85%              | cl. sol.   |
| 15    | $\text{Cu(OAc)}_2 \cdot \text{H}_2\text{O}$  | DMSO    | heat. and cool. | 6,4                                                               | 2,8                                   | 115%             | op. sol.   |
| 16    | $\text{Cu(OAc)}_2 \cdot \text{H}_2\text{O}$  | DMF     | heat. and cool. | 4,8                                                               | 1,6                                   | 88%              | cl. sol.   |
| 17    | $\text{Co(OAc)}_2 \cdot 4\text{H}_2\text{O}$ | DMSO    | heat. and cool. | 4,8                                                               | 2,0                                   | 88%              | op. sol.   |
| 18    | $\text{Co(OAc)}_2 \cdot 4\text{H}_2\text{O}$ | DMF     | heat. and cool. | 5,6                                                               | 2,0                                   | 76%              | cl. sol.   |
| 19    | $\text{CoCl}_2 \cdot 6\text{H}_2\text{O}$    | DMSO    | heat. and cool. | 4,4                                                               | 2,4                                   | 121%             | op. sol.   |
| 20    | $\text{CoCl}_2 \cdot 6\text{H}_2\text{O}$    | DMF     | heat. and cool. | 4,4                                                               | 2,0                                   | 101%             | cl. sol.   |

|    |                                         |      |                    |     |     |     |          |
|----|-----------------------------------------|------|--------------------|-----|-----|-----|----------|
| 21 | NiCl <sub>2</sub> ·6H <sub>2</sub> O    | DMSO | heat. and<br>cool. | 5,2 | 2,0 | 85% | op. sol. |
| 22 | NiCl <sub>2</sub> ·6H <sub>2</sub> O    | DMF  | heat. and<br>cool. | 5,6 | 2,4 | 95% | cl. sol. |
| 23 | -                                       | DMSO | heat. and<br>cool. | 5,2 | -   | -   | op. sol. |
| 24 | -                                       | DMF  | heat. and<br>cool. | 5,2 | -   | -   | cl. sol. |
| 25 | PdCl <sub>2</sub>                       | DMSO | heat. and<br>cool. | 8,8 | 2,0 | 68% | susp.    |
| 26 | PdCl <sub>2</sub>                       | DMF  | heat. and<br>cool. | 10  | 1,6 | 48% | cl. sol. |
| 27 | Cu(OAc) <sub>2</sub> ·H <sub>2</sub> O  | DMSO | heat. and<br>cool. | 8,4 | 2,8 | 88% | susp.    |
| 28 | Cu(OAc) <sub>2</sub> ·H <sub>2</sub> O  | DMF  | heat. and<br>cool. | 7,2 | 1,6 | 59% | cl. sol. |
| 29 | Co(OAc) <sub>2</sub> ·4H <sub>2</sub> O | DMSO | heat. and<br>cool. | 9,2 | 2,0 | 46% | susp.    |
| 30 | Co(OAc) <sub>2</sub> ·4H <sub>2</sub> O | DMF  | heat. and<br>cool. | 9,6 | 2,0 | 44% | cl. sol. |
| 31 | CoCl <sub>2</sub> ·6H <sub>2</sub> O    | DMSO | heat. and<br>cool. | 6,4 | 2,4 | 83% | susp.    |
| 32 | NiCl <sub>2</sub> ·6H <sub>2</sub> O    | DMSO | heat. and<br>cool. | 10  | 2,0 | 44% | susp.    |
| 33 | NiCl <sub>2</sub> ·6H <sub>2</sub> O    | DMF  | heat. and<br>cool. | 7,6 | 2,4 | 70% | cl. sol. |
| 34 | -                                       | DMSO | heat. and<br>cool. | 10  | -   | -   | susp.    |
| 35 | -                                       | DMF  | heat. and<br>cool. | 5,2 | -   | -   | cl. sol. |
| 36 | PdCl <sub>2</sub>                       | DMSO | heat. and<br>cool. | 12  | 2,0 | 48% | gel      |
| 37 | PdCl <sub>2</sub>                       | DMF  | heat. and<br>cool. | 12  | 1,6 | 41% | cl. sol. |
| 38 | Cu(OAc) <sub>2</sub> ·H <sub>2</sub> O  | DMSO | heat. and<br>cool. | 13  | 2,8 | 56% | susp.    |
| 39 | Cu(OAc) <sub>2</sub> ·H <sub>2</sub> O  | DMF  | heat. and<br>cool. | 10  | 1,6 | 41% | cl. sol. |
| 40 | Co(OAc) <sub>2</sub> ·4H <sub>2</sub> O | DMSO | heat. and<br>cool. | 11  | 2,0 | 38% | susp.    |
| 41 | Co(OAc) <sub>2</sub> ·4H <sub>2</sub> O | DMF  | heat. and<br>cool. | 19  | 2,0 | 23% | cl. sol. |



## Supporting Information

|    |                                      |      |                |     |     |     |     |          |
|----|--------------------------------------|------|----------------|-----|-----|-----|-----|----------|
| 42 | CoCl <sub>2</sub> ·6H <sub>2</sub> O | DMSO | heat.<br>cool. | and | 8,4 | 2,4 | 63% | susp.    |
| 43 | CoCl <sub>2</sub> ·6H <sub>2</sub> O | DMF  | heat.<br>cool. | and | 6,4 | 2,0 | 69% | cl. sol. |
| 44 | NiCl <sub>2</sub> ·6H <sub>2</sub> O | DMSO | heat.<br>cool. | and | 12  | 2,0 | 37% | susp.    |
| 45 | NiCl <sub>2</sub> ·6H <sub>2</sub> O | DMF  | heat.<br>cool. | and | 9,2 | 2,4 | 58% | cl. sol. |
| 46 | -                                    | DMSO | heat.<br>cool. | and | 13  | -   | -   | susp.    |
| 47 | -                                    | DMF  | heat.<br>cool. | and | 10  | -   | -   | cl. sol. |

op. gel = opaque gel; visc. susp. = viscous suspension; prec. = precipitate with clear solution; heat. = heating; cool. = cooling; sonic. = sonication

**Table S2** Screening of gel formation with different mixtures containing **C<sub>12</sub>-Cyc**, **click-C<sub>12</sub>-Cyc** and 250  $\mu$ L of solvent in the presence of gold and platinum salts.

| Entry | Metal salt                            | Solvent      | Gelator                         | Preparation     | $\beta$ (gelator) / mg/mL | $\beta$ (metal) / mg/mL | c (metal) / mol% | Apearance            |
|-------|---------------------------------------|--------------|---------------------------------|-----------------|---------------------------|-------------------------|------------------|----------------------|
| 1     | HAuCl <sub>4</sub> ·3H <sub>2</sub> O | Cyclohexane  | <b>click-C<sub>12</sub>-Cyc</b> | heat. and cool. | 15                        | 18,4                    | 177%             | clear sol.           |
| 2     | HAuCl <sub>4</sub> ·3H <sub>2</sub> O | DMSO         | <b>click-C<sub>12</sub>-Cyc</b> | heat. and cool. | 16                        | 15,6                    | 146%             | op. gel. yellow      |
| 3     | HAuCl <sub>4</sub> ·3H <sub>2</sub> O | Cyclohexane  | <b>C<sub>12</sub>-Cyc</b>       | heat. and cool. | 17                        | 11,6                    | 97%              | op. gel. yellow      |
| 4     | HAuCl <sub>4</sub> ·3H <sub>2</sub> O | DMSO         | <b>C<sub>12</sub>-Cyc</b>       | heat. and cool. | 16                        | 21,6                    | 190%             | op. gel. yellow      |
| 5     | PdCl <sub>2</sub>                     | Cyclohexane  | <b>click-C<sub>12</sub>-Cyc</b> | heat. and cool. | 15                        | 5,6                     | 103%             | op. sol.             |
| 6     | PdCl <sub>2</sub>                     | DMSO         | <b>click-C<sub>12</sub>-Cyc</b> | heat. and cool. | 15                        | 8,0                     | 147%             | op. sol.             |
| 7     | PdCl <sub>2</sub>                     | Cyclohexane  | <b>C<sub>12</sub>-Cyc</b>       | heat. and cool. | 15                        | 5,6                     | 99%              | op. sol. colorless   |
| 8     | PdCl <sub>2</sub>                     | DMSO         | <b>C<sub>12</sub>-Cyc</b>       | heat. and cool. | 10                        | 3,6                     | 97%              | op. sol. dark orange |
| 9     | HAuCl <sub>4</sub> ·3H <sub>2</sub> O | Nitromethane | <b>C<sub>12</sub>-Cyc</b>       | heat. and cool. | 24                        | 31,6                    | 186%             | prec. yellow         |
| 10    | HAuCl <sub>4</sub> ·3H <sub>2</sub> O | Nitromethane | <b>click-C<sub>12</sub>-Cyc</b> | heat. and cool. | 24                        | 28,8                    | 175%             | cl. sol. yellow      |
| 11    | HAuCl <sub>4</sub> ·3H <sub>2</sub> O | Diethylether | <b>C<sub>12</sub>-Cyc</b>       | heat. and cool. | 24                        | 22,0                    | 129%             | prec.                |
| 12    | HAuCl <sub>4</sub> ·3H <sub>2</sub> O | Acetone      | <b>C<sub>12</sub>-Cyc</b>       | heat. and cool. | 23                        | 22,0                    | 134%             | part. gel            |
| 13    | HAuCl <sub>4</sub> ·3H <sub>2</sub> O | Ethanol      | <b>C<sub>12</sub>-Cyc</b>       | heat. and cool. | 25                        | 22,8                    | 130%             | precipitate          |
| 14    | HAuCl <sub>4</sub> ·3H <sub>2</sub> O | Isopropanol  | <b>C<sub>12</sub>-Cyc</b>       | heat. and cool. | 26                        | 18,8                    | 103%             | op. gel              |
| 15    | HAuCl <sub>4</sub> ·3H <sub>2</sub> O | THF          | <b>C<sub>12</sub>-Cyc</b>       | heat. and cool. | 25                        | 16,8                    | 95%              | prec.                |
| 16    | HAuCl <sub>4</sub> ·3H <sub>2</sub> O | Isopropanol  | <b>click-C<sub>12</sub>-Cyc</b> | heat. and cool. | 52                        | 16,4                    | 46%              | cl. gel              |
| 17    | HAuCl <sub>4</sub> ·3H <sub>2</sub> O | Acetone      | <b>click-C<sub>12</sub>-Cyc</b> | heat. and cool. | 45                        | 16,4                    | 54%              | cl. gel              |
| 18    | HAuCl <sub>4</sub> ·3H <sub>2</sub> O | DMF          | <b>C<sub>12</sub>-Cyc</b>       | heat. and cool. | 24                        | 16,8                    | 99%              | op. gel              |
| 19    | HAuCl <sub>4</sub> ·3H <sub>2</sub> O | DMF          | <b>click-</b>                   | heat. and cool. | 24                        | 16,4                    | 100%             | op. gel              |

|    |                                       |     |                                      |                    |    |      |      |         |
|----|---------------------------------------|-----|--------------------------------------|--------------------|----|------|------|---------|
|    |                                       |     | <b>C<sub>12</sub>-Cyc</b>            | cool.              |    |      |      |         |
| 20 | HAuCl <sub>4</sub> ·3H <sub>2</sub> O | NMP | <b>C<sub>12</sub>-Cyc</b>            | heat. and<br>cool. | 24 | 16,8 | 99%  | op. gel |
| 21 | HAuCl <sub>4</sub> ·3H <sub>2</sub> O | NMP | <b>click-<br/>C<sub>12</sub>-Cyc</b> | heat. and<br>cool. | 24 | 16,4 | 100% | cl. gel |

op. gel = opaque gel; cl. gel = clear gel; prec. = precipitate; part. gel = partial gel (partial solution); cl. sol. = clear solution;  
op. sol. = opaque solution; heat. = heating; cool. = cooling

**Table S3** Screening of gel formation and reduction potential with different mixtures containing **C<sub>12</sub>-Cyc**, **click-C<sub>12</sub>-Cyc** and 250  $\mu$ L of solvent in the presence of  $\text{HAuCl}_4 \cdot 3 \text{H}_2\text{O}$  and reducing agents.

| Entry | Solvent | Gelator                         | Preparation               | Reducing agent (RA)   | $\beta$ (gelator) / mg/mL | $\beta$ (Au) / mg/mL | $c$ (Au) / mol% | $\beta$ (RA) / mg/mL | $c$ (RA) / mol% | Apearance                |
|-------|---------|---------------------------------|---------------------------|-----------------------|---------------------------|----------------------|-----------------|----------------------|-----------------|--------------------------|
| 1     | NMP     | <b>C<sub>12</sub>-Cyc</b>       | heat, sonic. <sup>a</sup> | $\text{NEt}_3$        | 26                        | 33,6                 | 160%            | 4,4                  | 81%             | op. gel<br>dark yellow   |
| 2     | NMP     | <b>click-C<sub>12</sub>-Cyc</b> | heat, sonic. <sup>a</sup> | $\text{Et}_3\text{N}$ | 25                        | 16,0                 | 81%             | 4,4                  | 87%             | visc. susp.<br>orange    |
| 3     | NMP     | <b>C<sub>12</sub>-Cyc</b>       | heat, sonic. <sup>b</sup> | Hydroquinone          | 25                        | 15,6                 | 76%             | 5,6                  | 98%             | op. gel<br>red-brown     |
| 4     | NMP     | <b>click-C<sub>12</sub>-Cyc</b> | heat, sonic. <sup>b</sup> | Hydroquinone          | 24                        | 24,0                 | 124%            | 5,2                  | 96%             | visc. susp.<br>red-brown |
| 5     | DMF     | <b>C<sub>12</sub>-Cyc</b>       | heat, sonic. <sup>a</sup> | $\text{Et}_3\text{N}$ | 26                        | 15,2                 | 71%             | 5,3                  | 96%             | op. gel<br>orange        |
| 6     | DMF     | <b>click-C<sub>12</sub>-Cyc</b> | heat, sonic. <sup>a</sup> | $\text{Et}_3\text{N}$ | 24                        | 18,0                 | 96%             | 5,3                  | 109%            | op. gel<br>yellow        |
| 7     | DMF     | <b>C<sub>12</sub>-Cyc</b>       | heat, sonic. <sup>b</sup> | Hydroquinone          | 24                        | 18,8                 | 97%             | 8,8                  | 162%            | op. gel<br>yellow        |
| 8     | DMF     | <b>click-C<sub>12</sub>-Cyc</b> | heat, sonic. <sup>b</sup> | Hydroquinone          | 25                        | 15,2                 | 76%             | 8,4                  | 150%            | op. gel<br>yellow        |
| 9     | DMF     | <b>C<sub>12</sub>-Cyc</b>       | heat, sonic.              | $\text{NaBH}_4$       | 27                        | 22,0                 | 100%            | 3,6                  | 170%            | op. gel<br>black red     |
| 10    | DMF     | <b>click-C<sub>12</sub>-Cyc</b> | heat, sonic.              | $\text{NaBH}_4$       | 24                        | 18,0                 | 95%             | 8,0                  | 438%            | prec.<br>black           |

op. gel = opaque gel; visc. susp. = viscous suspension; prec. = precipitate with clear solution; sonic. = sonication

a) Addition of  $\text{Et}_3\text{N}$  in last position and then application of heat + sonication

b) Addition of hydroquinone in first place and then addition of NMP and application of heat + sonication
